# Supplementary material for: DANCR Mediates the Rescuing Effects of Sesamin on Postmenopausal Osteoporosis Treatment via Orchestrating Osteogenesis and Osteoclastogenesis
Source: MDPI journal article supplement (doi:10.3390/nu13124455), 2021-12-13
Supplement: s1 [file s1]

**Supplementary Table S1. Summary of lncRNAs involved in osteogenesis and osteoclastogenesis processes**

| <b>Anti-osteogenesis</b>                                                            | <b>Pro-osteogenesis</b>                                                                          |
|-------------------------------------------------------------------------------------|--------------------------------------------------------------------------------------------------|
| NR2F2-AS1, XIST, MIAT, MIR31HG,<br>HOXA-AS3, HOTAIR, ORLNC1,<br><b><u>DANCR</u></b> | PGC1-OT1 AK141205, Linc-ROR,<br>H19, NTF3, MEG3, lnc-OG, MALAT1,<br>MDOR, BMNCR, lnc-OB1         |
| <b>Anti-osteoclastogenesis</b>                                                      | <b>Pro-osteoclastogenesis</b>                                                                    |
| NRON, NONMMUT037835.2                                                               | AK077216, <b><u>DANCR</u></b> , Gm12310,<br>Gm12308, PBOV-1, lncRNA-Jak3,<br>AK131850, LINC00311 |

**Supplementary Table S2. Primers used for vector construction and Real-time PCR assays**

| Primers for Real-time PCR |               |        |                                                     |                   |
|---------------------------|---------------|--------|-----------------------------------------------------|-------------------|
| Gene ID                   | Accession No. | F/R    | Sequence                                            | Product size (bp) |
| mRunx2                    | NM_001146038  | F<br>R | ACACCGTGTCTCAGCAAAGC<br>GCTCACGTCGCTCATCTTG         | 99                |
| mALP                      | NM_007431     | F<br>R | ACTGCGCTCCTTAGGGCT<br>GGCAGCGTCAGATGTTAATTG         | 104               |
| mOCN                      | NM_007541     | F<br>R | GGTAGTGAACAGACTCCGGC<br>CAAGCAGGGTTAAGCTCACA        | 96                |
| mOPN                      | NM_001204201  | F<br>R | ATTGCTTTTGCCTGTTTGG<br>TGGCTATAGGATCTGGGTGC         | 109               |
| mBMP2                     | NM_007553     | F<br>R | AACACCGTGCGCAGCTTCCATC<br>CGGAAGATCTGGAGTTCTGCAG    | 143               |
| m $\beta$ -catenin        | NM_007614     | F<br>R | GAGCCGTCAGTGCAGGAG<br>CAGCTTGAGTAGCCATTGTCC         | 129               |
| mCD44                     | NM_009851     | F<br>R | CAAGTTTTGGTGGCACACAG<br>AGCGGCAGGTTACATTCAA         | 95                |
| mCCND1                    | NM_001379248  | F<br>R | TCCTCTCCAAAATGCCAGAG<br>GGGTGGGTTGGAAATGAAC         | 110               |
| m-Myc                     | NM_010849     | F<br>R | AGAGCTCCTCGAGCTGTTTG<br>TGAAGTTCACGTTGAGGGG         | 91                |
| mTRAP                     | NM_001102405  | F<br>R | CTGGAGTGCACGATGCCAGCGACA<br>TCCGTGCTCGGCGATGGACCAGA | 419               |
| mFos                      | NM_010234     | F      | CCAGTCAAGAGCATCAGCAA                                | 247               |

|         |              |        |                                                |     |
|---------|--------------|--------|------------------------------------------------|-----|
|         |              | R      | AAGTAGTGCAGCCCGGAGTA                           |     |
| mCathK  | NM_007802    | F<br>R | CTTCCAATACGTGCAGCAGA<br>TCTTCAGGGCTTTCTCGTTC   | 155 |
| mNFATc1 | NM_016791    | F<br>R | CCGTTGCTTCCAGAAAATAACA<br>TGTGGGATGTGAACTCGGAA | 152 |
| mDANCR  | NR_145131    | F<br>R | CCTCTCCCGGATGGCTGTAT<br>AGCCATTCAGTCACGGGTTT   | 162 |
| mGAPDH  | NM_001289726 | F<br>R | CGTCCCGTAGACAAAATGGT<br>TTGATGGCAACAATCTCCAC   | 110 |

“m” stands for “mouse”.
